# Supplementary material for: Novel HIV-1 Knockdown Targets Identified by an Enriched Kinases/Phosphatases shRNA Library Using a Long-Term Iterative Screen in Jurkat T-Cells
Source: PLOS journal article supplement (doi:10.1371/journal.pone.0009276), 2010-02-16
Supplement: S10 (10.1371/journal.pone.0009276.s010) [file journal.pone.0009276.s010]

**Table 3. Genes identified in this screen as important for HIV-1 replication**

| Symbol  | Synonyms                                                                      | Name                                                                                             | Gene ID   | Subcellular Localization                                                         | Molecular class                                                             | Molecular function                                       | Biological Importance                                                                                                                                                                                                                                                                            | References                                                                                                                                                                                                                                  |
|---------|-------------------------------------------------------------------------------|--------------------------------------------------------------------------------------------------|-----------|----------------------------------------------------------------------------------|-----------------------------------------------------------------------------|----------------------------------------------------------|--------------------------------------------------------------------------------------------------------------------------------------------------------------------------------------------------------------------------------------------------------------------------------------------------|---------------------------------------------------------------------------------------------------------------------------------------------------------------------------------------------------------------------------------------------|
| PTPN9   | MEG2 ; PTPMEG2                                                                | Protein Tyrosine Phosphatase, non-receptor type 9                                                | NM_002833 | Cytoplasm                                                                        | Tyrosine phosphatase.                                                       | Protein tyrosine phosphatase activity                    | Involved in intracellular traffic of secretory pathways and regulation of vesicular fusion                                                                                                                                                                                                       | Huynh, H. et al.2004. <i>Nat Cell Biol</i> <b>6</b> , 831-839; Saito, K. Et al. 2007. <i>J Biol Chem</i> <b>282</b> ,15170-15178                                                                                                            |
| PTPRE   | PTPE; HPTPE; FLJ57799; FLJ58245; DKFZp313F1310; R-PTP-EPSILON                 | PTPRE protein tyrosine phosphatase, receptor type, E                                             | NM_006504 | Plasma membrane/cytoplasm                                                        | Receptor tyrosine phosphatase                                               | Receptor signaling protein tyrosine phosphatase activity | Negative regulator of cell proliferation in endothelial cells, of Erk and MAPK pathway in fibroblasts and of Jak-STAT signalling in M1 myeloid cells                                                                                                                                             | Thompson, L.J. et al. 2001. <i>Am J Physiol Heart Circ Physiol</i> <b>281</b> , H396-403; Toledano-Katchalski, H. et al.2003. <i>Mol Cancer Res</i> <b>1</b> , 541-555; Tanuma, N. et al. 2000. <i>J Biol Chem</i> <b>275</b> , 28216-28221 |
| PRKD1   | PKD; PKCM; PRKCM; PKC-MU                                                      | Protein kinase D1                                                                                | NM_002742 | Plasma membrane/cytoplasm/Golgi apparatus/Mitochondrion                          | Serine/threonine kinase. Member of the protein kinase C (PKC) family        | Protein serine/threonine kinase activity                 | Targeted by DAG that regulates PRKD1 intracellular localization. Activated by PKC. Involved in cell growth, gene expression, survival, motility, protein trafficking and lymphocyte biology                                                                                                      | Wang, Q.J. et al. 2006 <i>Trends Pharmacol Sci</i> <b>27</b> , 317-323.                                                                                                                                                                     |
| MAP3K2  | MEKK2; MEKK2B                                                                 | Mitogen-activated protein kinase kinase kinase 2                                                 | NM_006609 | Cytoplasm/nucleus                                                                | Serine/threonine kinase. MEK kinase family                                  | Protein serine/threonine kinase activity                 | MAPK pathway. Leads to ERK1/2, JNK, p38MAPK and ERK5 activation                                                                                                                                                                                                                                  | Chen, Z. et al. 2001. <i>Chem Rev</i> <b>101</b> , 2449-2476                                                                                                                                                                                |
| MAPK9   | JNK2; SAPK; p54s; JNK2A; JNK2B; PRKM9; JNK-55; JNK2BETA; p54aSAPK; JNK2ALPHA; | Mitogen-activated protein kinase 9                                                               | NM_139069 | Cytoplasm/nucleus                                                                | Serine/threonine kinase, MAPK family                                        | Protein serine/threonine kinase activity                 | MAPK cascade. With a controversial role: Studies indicate that is a negative player in cell proliferation; others refute, presenting it as a positive regulator of c-Jun.                                                                                                                        | Chen, Z. et al. 2001. <i>Chem Rev</i> <b>101</b> , 2449-2476; Sabapathy, K. et al. 2004. <i>Cell Cycle</i> <b>3</b> , 1520-1523; 24. Jaeschke, A. et al. <i>Molecular Cell</i> <b>23</b> , 899-911.                                         |
| SGK     | SGK1                                                                          | serum/glucocorticoid regulated kinase 1                                                          | NM_005627 | Cytoplasm/Endoplasmic Reticulum/nucleus                                          | Serine/threonine kinase                                                     | Protein serine/threonine kinase activity                 | Like PKB, SGK is activated by phosphorylation in response to signals that stimulate PI3K, and this is mediated by PKD1 and other unknown kinases. Various proteins were identified as SGK substrates such as GSK3, the transcription factor FOXO3, Raf kinase, the MEKK319 and recently NF-κB20. | Loffing, J. et al. 2006. <i>Annu Rev Physiol</i> <b>68</b> , 461-490; Tai, D.J. et al. 2009. <i>J Biol Chem</i> <b>284</b> , 4073-4089.                                                                                                     |
| STK24   | MST3; STK3; MST-3; MST3B; STE20                                               | Serine/threonine kinase 24 (STE20 homolog, yeast)                                                | NM_003576 | Cytoplasm/nucleus                                                                | Serine/threonine kinase                                                     | Protein serine/threonine kinase activity                 | Regulation of cell cycle by phosphorylation and subsequent activation of NDR protein, leading to NDR pathway activation which control cell shape and cell cycle                                                                                                                                  | Stegert, M.R. et al. 2005. <i>Mol Cell Biol</i> <b>25</b> , 11019-11029                                                                                                                                                                     |
| CIB2    | KIP2                                                                          | Calcium and integrin binding family member 2                                                     | NM_006383 | Cytoplasm/nucleus (?)                                                            | Calcium binding protein                                                     | Calcium ion binding                                      | Protein with unknown function. Isolog of KIP/CIB gene (DNA PKcs interacting protein)                                                                                                                                                                                                             | Seki, N. et al. 1999. <i>Biochim Biophys Acta</i> <b>1444</b> , 143-7                                                                                                                                                                       |
| PPFIA2  | FLJ41378; MGC132572                                                           | Protein tyrosine phosphatase, receptor type, f polypeptide interacting protein (liprin), alpha 2 | NM_003625 | Plasma membrane/Cytoplasm                                                        | Anchor protein                                                              | Cytoskeletal anchoring activity                          | Alter PTPRF cellular localization and induces clustering                                                                                                                                                                                                                                         | Serra-Pages, C. et al. 1998. <i>J Biol Chem</i> <b>273</b> , 15611-20                                                                                                                                                                       |
| PPFIBP1 | L2; hSGT2; hSgt2p                                                             | PTPRF interacting protein, binding protein 1 (liprin beta 1)                                     | NM_003622 | Plasma membrane/Cytoplasm                                                        | Anchor protein                                                              | Cytoskeletal anchoring activity                          | Role in tumorigenesis                                                                                                                                                                                                                                                                            | Kriajevska, M. et al. 2002. <i>J Biol Chem</i> <b>277</b> , 5229-35                                                                                                                                                                         |
| RAD23B  | P58; HR23B; HHR23B; RAD23B                                                    | RAD23 homolog B (S. cerevisiae)                                                                  | NM_002874 | Cytoplasm/nucleus                                                                | DNA repair protein                                                          | DNA binding                                              | RAD23A homologous. Has a function in DNA repair (NER pathway) and protein stability by ubiquitin-proteasome system regulation.                                                                                                                                                                   | van Hoffen, A. et al. 2003. <i>Toxicology</i> <b>193</b> , 79-90; Sweder, K & Madura, K. 2002. <i>J Biomed Biotechnol</i> <b>2</b> , 94-105                                                                                                 |
| EZH2    | ENX1; EZH1; KMT6; ENX-1; MGC9169                                              | Enhancer of zeste homolog 2                                                                      | NM_004456 | Nucleus                                                                          | Transcription regulatory protein. Member of the Polycomb-group (PcG) family | DNA binding                                              | Involved in maintaining the transcriptional repressive state of human genes by DNA methylation over successive cell generations to assure cellular identity                                                                                                                                      | Vire, E. et al. 2006. <i>Nature</i> <b>439</b> , 871-4.                                                                                                                                                                                     |
| WT1     | GUD; WAGR; WT33; WIT-2                                                        | Wilms tumor 1                                                                                    | NM_024424 | Nucleus                                                                          | Transcription factor                                                        | Transcription regulator activity                         | Involved in: regulation of cell proliferation ; regulation of gene expression, epigenetic ; cell differentiation ; hemopoiesis                                                                                                                                                                   | Morrison, A.A. 2008 <i>Biochimica et Biophysica Acta</i> <b>1785</b> , 55-62; Yang, L. 2007. <i>Leukemia</i> <b>21</b> , 868-876                                                                                                            |
| ELA1    | CELA1                                                                         | Elastase 1, pancreatic                                                                           | NM_001971 | Extracellular region/Endoplasmic reticulum/Cytoplasmic vesicle Secretory granule | Serine Protease                                                             | Serine-type peptidase activity                           | Hydrolyses many other protein than Elastase. Seems to activate -κB, AP-1, and NFAT in human myeloid cell.                                                                                                                                                                                        | Hietaranta, A. et al. 2004. <i>Biochem Biophys Res Commun</i> <b>323</b> , 192-6.                                                                                                                                                           |
